# Supplementary material for: Emulsion-template synthesis of mesoporous nickel oxide nanoflowers composed of crossed nanosheets for effective nitrogen reduction
Source: Royal Society of Chemistry journal article supplement (doi:10.1039/d1dt00213a), 2021-01-01
Supplement: d1dt00213a1.pdf [file d1dt00213a1.pdf]

## Supporting Information

### **Emulsion-Template Synthesis of Mesoporous Nickel Oxide Nanoflowers Composed of Crossed Nanosheets for Effective Nitrogen Reduction**

Min Zhou<sup>a</sup>, Wei Xiong<sup>a,\*</sup>, Hao Li<sup>b,\*</sup>, Da Zhang<sup>c</sup>, Yaokang Lv<sup>d</sup>

*<sup>a</sup> Key Laboratory for Green Chemical Process (Ministry of Education), Engineering Research Center of Phosphorus Resources Development and Utilization of Ministry of Education, Hubei Key Laboratory Of Novel Reactor & Green Chemical Technology, School of Chemistry and Environmental Engineering, Wuhan Institute of Technology, Wuhan 430205, China*

*<sup>b</sup> Department of Physics, Technical University of Denmark, Lyngby 2800, Denmark*

*<sup>c</sup> Changjiang River Scientific Research Institute, Wuhan 430071, China*

*<sup>d</sup> College of Chemical Engineering, Zhejiang University of Technology, Hangzhou 310014, China*

---

\*Corresponding author. E-mail address: xiongwei@wit.edu.cn (W. X); haoli@dtu.dk (H. L)

Tel/Fax: +86-27-87195001.

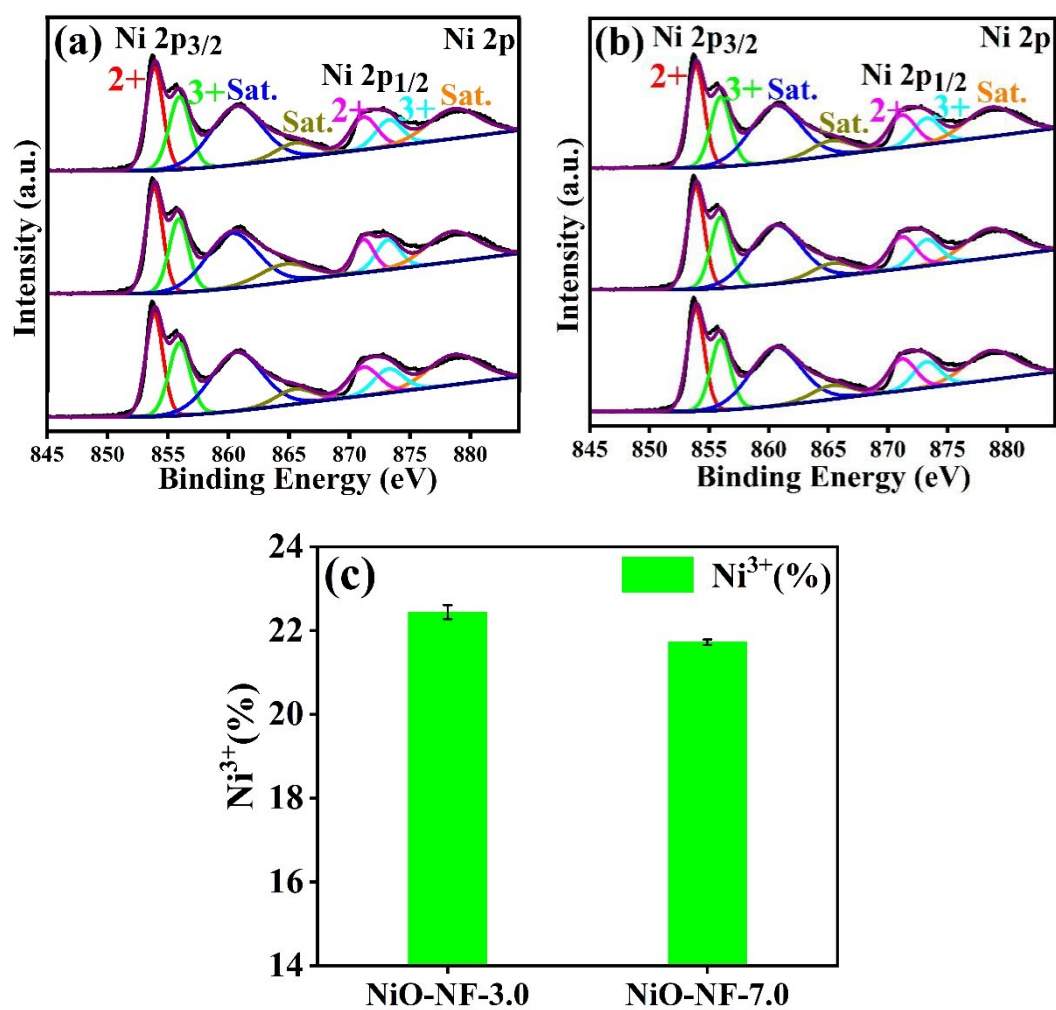

**Fig.S1.** XPS spectra for Ni 2p of (a) NiO-NF-3.0, (b) NiO-NF-7.0 (testing three times) and (c) corresponding  $\text{Ni}^{3+}$  concentration of NiO-NF-3.0 and NiO-NF-7.0.

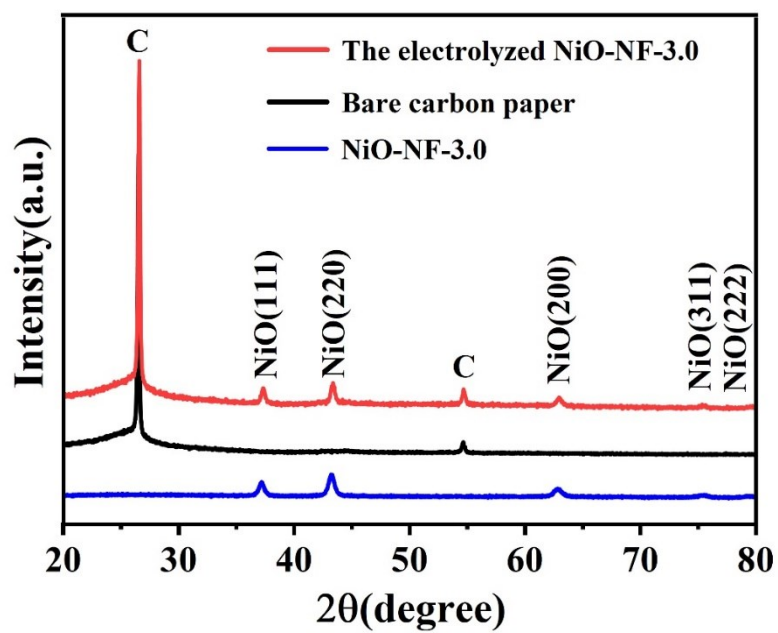

**Fig.S2.** XRD patterns of the electrolyzed NiO-NF-3.0 (red line), Bare carbon paper (black line) and NiO-NF-3.0 (blue line).
